# Supplementary material for: Stereoselective synthesis of (2S,3S,4Z)-4-fluoro-1,3-dihydroxy-2-(octadecanoylamino)octadec-4-ene, [(Z)-4-fluoroceramide], and its phase behavior at the air/water interface
Source: Beilstein J Org Chem. 2008 Apr 25;4:12. doi: 10.3762/bjoc.4.12 (PMC2486483; doi:10.3762/bjoc.4.12)
Supplement: File 1 — General methods, synthesis of the compounds and spectroscopic structure assignment. [file Beilstein_J_Org_Chem-04-12-s001.doc]

**Stereoselective synthesis of (2*S*,3*S*,4*Z*)-4-fluoro-1,3-dihydroxy-2-(octadecanoylamino)octadec-4-ene, [(*Z*)-4-fluoroceramide], and its phase behavior at the air/water interface**

Gergana S. Nikolova and Günter Haufe*

Address: Organisch-Chemisches Institut, Westfälische Wilhelms-Universität Münster, Corrensstr. 40, D-48149 Münster, Germany

Email: Gergana S. Nikolova – [nikolova@uni-muenster.de](mailto:nikolova@uni-muenster.de); Günter Haufe* – [haufe@uni-muenster.de](mailto:haufe@uni-muenster.de)

* Corresponding author

Description: General methods, synthesis of the compounds and spectroscopic structure assignment.

**Experimental**

**General Methods**

Melting points are uncorrected and were taken on a Reichert microscope. Column chromatography was performed on silica gel 60 (0.063-0.200 mm) from Merck. For HPLC a Merck-Hitachi system D‑7000 with a pump L‑7150 and a refractometer Shodex RI‑72 were used. The preparative HPLC was carried out on a Macherey-Nagel column SP 250/21 Nucleosil 50‑7D‑700. NMR spectra were recorded on a Bruker ARX300 (1H NMR, 300 MHz; 13C NMR, 75 MHz; 19F NMR, 282 MHz) and a Varian Inova (1D 1H NMR, 500 MHz and 13C NMR, 126 MHz, 2D 1H,1H gCOSY 1H,13C gHMBC, 1H,13C gHSQC) spectrometers using TMS (1H), CDCl3 (13C) and CFCl3 (19F) as internal standards. The ESI-MS spectra were recorded on a Bruker Daltronics Micro Tof. Specific optical rotation [**]D20 was measured with a Perkin-Elmer 341 polarimeter in units of deg·cm3dm-1·g-1. All air‑ and moisture-sensitive reactions were performed under argon atmosphere applying the standard Schlenck-technique. Solvents were purified and dried where necessary using literature methods. Surface pressure-Molecular area (‑A) isotherms were recorded on a 622 type NIMA Teflon trough (Coventry, U. K.) with a total surface area of 1300 cm2. The surface pressure was measured with a Wilhelmy plate system. Ultra pure water (5.5 pH) was obtained from a Millipore system comprising reverse osmosis, ion exchange and 0.22 m ultra filtration cartridges. The ceramides were dissolved in CDCl3:CD3OD, 9:1 (HPLC grade), purchased from Merck (Darmstadt, Germany), to have solutions with 1.3·10-3 mol/Lconcentration (0.750 mg/ml for **2a**, 0.785 mg/ml for **2b**). Monolayer was prepared by spreading the appropriate solution onto the water surface using a 100 L syringe. After 10 min of solvent evaporation the monolayer was compressed with a velocity of 80 cm2/min.

**Synthesis of the compounds and spectroscopic structure assignment**

***tert*-Butyl and Ethyl (2*R*,3*S*,4*Z*)‑4-Fluoro-3-hydroxy-2-(2-hydroxy-2,6,6-trimethylbicyclo[3.1.1]­heptan-3-ylideneamino)octadec-4-ene acetates (5 and 6).** To an ice-cold solution of *tert*-butyl (1*R*,2*R*,5*R*)-(+)‑(2-hydroxy-2,7,7-trimethylbicyclo[3.1.1]heptan‑3-ylideneamino) acetate (**4**) [[[1]](#endnote-2)] (3.35 g, 11.9 mmol, 1.1 equiv, >99% ee, >99% de) in anhydrous CH2Cl2 (7 mL) under argon atmosphere were added successively ClTi(OEt)3 [[[2]](#endnote-3)] (3.78 g, 17.3 mmol, 1.6 equiv) in anhydrous CH2Cl2 (7 mL), (*Z*)‑2‑fluorohexadec‑2‑enal (**3**) [[[3]](#endnote-4)] (2.78 g, 10.8 mmol) in anhydrous CH2Cl2 (6 mL) and anhydrous Et3N (3 mL, 2.19 g, 21.6 mmol, 2.0 equiv). The reaction mixture was stirred for 13 h at 0°C and then quenched with brine (120 mL). After the aqueous phase was extracted with EtOAc (4  80 mL) the combined organic extracts were dried over MgSO4 and concentrated under vacuum. 19F NMR analysis of the crude product showed the formation of the *tert*-butyl imino acid ester **5**, the ethyl imino acid ester **6** and four non-identified compounds (among them probably diastereomers of the title compounds) in a 57:28:7:1:2:5 ratio at  126.91 ppm,  127.31 ppm,  127.36 ppm,  128.26 ppm,  128.72 ppm, and  129.26, respectively. The aldehyde **3** (12% of the crude product) was also found in the isolated mixture. According to the ESI‑MS spectra iminoglycinate **4** and its analogue with ethoxy group **6**, as well 2-hydroxypinan-3-one were also present in the crude product. During the purification by column chromatography (Et2O:hexane, 7:3) partial cleavage of the C(2)-C(3)-bond (retroaldol reaction) and partial elimination of 2-hydroxypinan-3-one occurred. Therefore the crude product was used in the following deprotection step without purification. Yield: 5.24 g (crude). In a similar experiment at r.t. a mixture of *tert*-butyl imino acid ester **5** (70%, 19F NMR), ethyl imino acid ester **6** (10%), aldehyde **3** (16%) and a non-identified product (4%) was isolated after column chromatography. This mixture was characterized spectroscopically. *tert*-Butyl imino acid ester **5**. 1H NMR (300 MHz, CDCl3)  0.88 (t, 3*J*H,H = 6.0 Hz, 3 H, CH3), 0.90 (s, 6 H, 2CH3), 1.231.28 (m, 24 H, CH2), 1.33 (s, 3 H, CH3), 1.39 (s, 3 H, CH3), 1.43 (s, 9 H, 3CH3), 1.48 (d, 3*J*H,H = 5.6 Hz, 1 H, CH2 *anti*), 2.022.08 (m, 2 H, 2CH), 2.282.38 (m, 2 H, CH2 syn), 2.612.63 (AB, 2 H, CH2), 4.08 (br. s, 1 H, OH), 4.32 (d, 3*J*H,H = 7.8 Hz, 1 H, 2-CH), 4.55 (dd, 3*J*H,F = 19.8 Hz, 3*J*H,H = 7.9 Hz, 1 H, 3-CH), 4.90 (dt, 3*J*H,F = 37.6 Hz, 3*J*H,H = 7.5 Hz, 1 H, 5‑CH); 13C NMR (75 MHz, CDCl3)  14.1 (q), 22.7 (t), 22.8 (q), 25.3 (q), 27.3 (q), 28.0 (q), 28.1 (t), 28.4, 29.1, 29.3, 29.4, 29.6, 29.6 (all t), 31.9 (t), 33.4 (t), 38.4 (d), 38.5 (s), 50.0 (d), 64.8 (d, C-2), 72.0 (dd, 2*J*C,F = 27.6 Hz, C-3), 77.1 (s), 82.4 (s), 109.8 (dd, 2*J*C,F = 12.5 Hz, C-5), 156.1 (d, 1*J*C,F = 255.2 Hz, C‑4), 169.5 (s), 180.8 (s); 19F NMR (282 MHz, CDCl3)  127.1 (dd, 3*J*F,H = 38.2 Hz, 3*J*F,H = 20.4 Hz); ESI-MS m/z (%): 560 (59) [M + Na]+, 538 (100) [M + H]+, 482 (26) [538 – C4H8+] 464 (8). Ethyl imino acid ester **6**. Most of the signals for **6** in 1H and 13C NMR are overlapping with the signals of the *tert*-butyl imino acid ester **5**. 1H NMR (300 MHz, CDCl3)  1.28 (t, 3 H, CH3), 4.12 (q, 3*J*H,H = 7.2 Hz, 2 H, CH2), 4.42 (d, 3*J*H,H = 7.7 Hz, 1 H, 2-CH); 13C NMR (75 MHz, CDCl3)  14.2 (q), 61.4 (t), 64.3 (d, C-2). 19F NMR (282 MHz, CDCl3)  127.4 (dd, 3*J*F,H = 38.3 Hz, 3*J*F,H = 18.7 Hz); ESI-MS m/z (%): 532 (17) [M + Na]+, 510 (21) [M + H]+.

***tert*‑Butyl and Ethyl (2*R*,3*S,*4*Z*)‑2‑Amino-4‑fluoro-3‑hydroxyoctadec-4‑enoates (7 and 9).** The crude product (5.00 g, 9.3 mmol, based on the molecular weight of the main component **5** of the mixture) obtained in the aldol reaction described above, was dissolved in THF (16 mL) and 15% aq solution of citric acid (64 mL) and stirred at r.t. for 68 h. After evaporation of the solvent under vacuum the aqueous phase was neutralized with Na2CO3 to pH=7 and extracted with Et2O (4  60 mL). The combined organic layer was dried over Na2SO4 and concentrated under vacuum. 19F NMR analysis of the crude product showed the formation of three main compounds: *tert*-butyl amino acid ester **7**, 2‑amino-4‑fluoro-3‑hydroxyoctadec-4‑enoic acid (**8**) and the ethyl amino acid ester **9** in a 31:25:44 ratio, respectively. Because of partial decomposition of the title compounds on silica gel, the crude product was used in the following reaction without purification. Yield: 4.00 g (crude). By a similar experiment compounds **7** and **9** were isolated after column chromatography (Et2O:MeOH, 99:1), followed by recrystallization from pentane, as white solids in 99% and 61% (a mixture of **7** and **9** in ratio 39:61) purity, respectively, and spectroscopically characterized. *tert*‑Butyl (2*R*,3*S*,4*Z*)-2‑amino-4‑fluoro-3‑hydroxy­octadec-4‑enoate(**7**). Mp 42–44 °C (pentane); [**]D20 = +19.7 (*c* = 1.00, CHCl3); 1H NMR (300 MHz, CDCl3)  0.88 (t, 3*J*H,H = 6.7 Hz, 3 H, CH3), 1.231.30 (m, 22 H, CH2), 1.46 (s, 9 H, CH3), 2.07 (m, 3*J*H,H = 6.6 Hz, 2 H, 6-CH2), 2.44 (br s, 1 H, OH), 3.61 (d, 3*J*H,H = 5.0 Hz, 1 H, 2-CH), 4.38 (dd, 3*J*H,F = 13.2 Hz, 3*J*H,H = 5.2 Hz, 1 H, 3-CH), 4.90 (dt, 3*J*H,F = 38.0 Hz, 3*J*H,H = 7.6 Hz, 1 H, 5‑CH); 13C NMR (75 MHz, CDCl3)  14.1 (q), 22.7 (t), 23.3 (dt, 3*J*C,F = 4.3 Hz, C-6), 28.0 (q), 29.2, 29.3, 29.4, 29.6, 29.6 (all t), 31.9 (t), 57.5 (d, C-2), 70.3 (dd, 2*J*C,F = 31.4 Hz, C‑3), 82.1 (s), 108.6 (dd, 2*J*C,F = 12.5 Hz, C‑5), 156.7 (ds, 1*J*C,F = 256.7 Hz), 171.6 (s); 19F NMR (282 MHz, CDCl3)  123.2 (dd, 3*J*F,H = 38.2 Hz, 3*J*F,H = 13.2 Hz); ESI-MS m/z (%): 410 (36) [M + Na]+, 388 (100) [M + H]+, 332 (100), 314 (57), 294 (8), 270 (22) (daughters of 388 (31)). Ethyl (2*R*,3*S*,4*Z*)-2‑amino-4‑fluoro-3‑hydroxyoctadec-4‑enoate (**9**). 1H NMR (300 MHz, CDCl3)  0.88 (t, 3*J*H,H = 6.8 Hz, 3 H, CH3), 1.231.29 (m, 22 H, CH2), 1.28 (t, 3*J*H,H = 7.1 Hz, 3 H, CH3), 2.07 (m, 3*J*H,H = 6.8 Hz, 2 H, 6-CH2), 2.41 (br s, 1 H, OH), 3.69 (d, 3*J*H,H = 4.7 Hz, 1 H, 2-CH), 4.20 (q, 3*J*H,H = 7.2 Hz, 2 H, CH2), 4.38 (dd, 3*J*H,F = 13.5 Hz, 3*J*H,H = 5.6 Hz, 1 H, 3-CH), 4.89 (dt, 3*J*H,F = 38.1 Hz, 3*J*H,H = 7.5 Hz, 1 H, 5‑CH); 13C NMR (75 MHz, CDCl3)  14.05 (q), 14.1 (q), 22.7 (t), 23.3 (dt, 3*J*C,F = 3.7 Hz, C-6), 29.2, 29.2, 29.3, 29.4, 29.6, 29.6 (all t), 31.9 (t), 57.1 (d, C-2), 61.3 (t), 70.4 (dd, 2*J*C,F = 30.9 Hz, C‑3), 108.8 (dd, 2*J*C,F = 12.5 Hz, C‑5), 156.5 (ds, 1*J*C,F = 255.3 Hz), 172.7 (s); 19F NMR (282 MHz, CDCl3)  124.0 (dd, 3*J*F,H = 38.1 Hz, 3*J*F,H = 13.1 Hz); ESI-MS m/z (%): 360 (100) [M + H]+, 342 (100), 322 (2), 314 (2), 298 (4), 268 (12) (daughters of 360 (18)). 2‑Amino-4‑fluoro-3‑hydroxyoctadec-4‑enoic acid (**8**). 19F NMR (282 MHz, CDCl3)  123.4 (dd, 3*J*F,H = 35.1 Hz, 3*J*F,H = 18.4 Hz); ESI-MS m/z (%): 332 (12) [M + H]+, 314 (57), 294 (14), 276 (14), 270 (18) (daughters of 332 (100)).

**(2*S*,3*S*,4*Z*)‑2-Amino-4-fluorooctadec-4-ene-1,3-diol (1b) (4‑Fluorosphingosine)**. The crude product (3.60 g, 9.3 mmol, based on the molecular weight of the main component **7** of the mixture) obtained from the hydrolysis described above, was dissolved in EtOH:H2O (3:1) (80 mL). NaBH4 (1.30 g, 34.4 mmol, 8.0 equiv) was added portion wise at 0 °C. The aqueous mixture was stirred for 28 h at 0°C and then quenched with water. The new phase was extracted four times with CH2Cl2 and twice with CH2Cl2/MeOH mixture. The combined organic extracts were dried over NaSO4 and concentrated under vacuum. 19F NMR analysis of the crude product showed the formation of the titled compound **1b** and a non-identified product ( 125.5 ppm) in a 97:3 ratio, as well as 24% of non-converted *tert*-butyl ester **7** and other non-identified products with chemical shifts between  113.7 ppm and  120.5 ppm (together 46%, 19F NMR). Because of the observed instability of **1b**, the crude product was used in the following reaction without purification. Yield: 3.03 g (crude). By a similar experiment compound **1b** was isolated after column chromatography (CHCl3:MeOH:H2O, 13:6:1) as a white solid and spectroscopically characterized as a mixture with 30% of a non-identified product.4‑Fluorosphingosine (**1b**). 1H NMR (500 MHz, CD3OD)  0.90 (t, 3*J*H,H = 6.9 Hz, 3 H, CH3), 1.291.34 (m, 22 H, CH2), 1.37-1.43 (m, 2 H, CH2), 2.05-2.17 (m, 2 H, CH2), 2.97-3.04 (m, 1 H, 2-CH), 3.71 (dd, 2*J*H,H = 11.2 Hz, 3*J*H,H = 3.5 Hz, 1 H, 1‑CH2), 3.59 (dd, 2*J*H,H = 11.2 Hz, 3*J*H,H = 6.7 Hz, 1 H, 1‑CH2), 4.05 (dd, 3*J*H,F = 17.6 Hz, 3*J*H,H = 6.6 Hz, 1 H, 3-CH), 4.96 (dt, 3*J*H,F = 37.9 Hz, 3*J*H,H = 7.5 Hz, 1 H, 5‑CH); 13C NMR (126 MHz, CD3OD)  14.8 (q), 24.1 (t), 24.6 (dt, 3*J*C,F = 4.3 Hz, C-6), 30.7, 30.8, 30.9, 31.1, 31.1, 31.1 (all t), 33.4 (t), 55.6 (d, C-2), 63.4 (t, C‑1), 72.6 (dd, 2*J*C,F = 29.4 Hz, C‑3), 109.9 (dd, 2*J*C,F = 12.7 Hz, C‑5), 159.3 (ds, 1*J*C,F = 256.5 Hz, C‑4); 19F NMR (282 MHz, CD3OD)  125.3 (dd, 3*J*F,H = 37.7 Hz, 3*J*F,H = 17.9 Hz); The assignment of the signals was confirmed by 2D 1H,1H gCOSY, 1H,13C gHMBC, and 1H,13C gHSQC NMR spectra. ESI-MS m/z (%): 635 (4) [2M + H]+, 318 (100) [M + H]+, 300 (11), 270 (1).

**(2*S*,3*S,*4*Z*)-4-Fluoro-1,3-dihydroxy-2-(octadecanoylamino)-octadec-4-ene (2b) (4-Fluoro­ceramide).** To a suspension of the crude product (2.60 g, 8.2 mmol, based on the molecular weight of the main component **1b** of the mixture) obtained from the reduction described above, in THF (41 mL), a 50% aq solution of AcONa (25 mL) and stearoyl acid chloride (3.6 g, 10.7 mmol, 1.3 equiv) were added. After stirring for 24 h at r.t. the reaction mixture was poured into brine (60 mL). The phases were separated and the aqueous layer was extracted with THF (3  100 mL). The combined organic phases were washed with brine (2  300 mL), dried over NaSO4, filtered through a short pad of silica gel and concentrated under vacuum. 19F NMR analysis of the crude product showed the formation of the *N-*octadecanoyl derivative of compound **7**, a non-identified product ( 124.8 ppm) and the titled compound **2b** in a 27:1:72 ratio, respectively, as well as other non-identified products with chemical shifts between  115.0 ppm and  124.3 ppm. Yield: 6.70 g (crude). A fraction of the crude product (0.10 g) was purified by HPLC (CHCl3:MeOH, 98:2) and 4-fluoroceramide (**2b**) was isolated as a white solid in 76% purity (19F NMR). Yield: 0.03 g (30%, **2b**). By a similar experiment compound **2b** was isolated in 86% purity after HPLC (CHCl3:MeOH, 98:2) and spectroscopically characterized. For the investigations on the phase behavior of **2b** at the air/water interface a >99% pure compound obtained by repeated HPLC was used. 4-Fluoroceramide (**2b**). Mp 100–102 °C (CHCl3/MeOH, 99% pure **2b**), 1H NMR (300 MHz, CDCl3:CD3OD, 9:1)  0.88 (br t, 3*J*H,H = 6.2 Hz, 6 H, CH3), 1.201.33 (m, 22 H, CH2), 1.561.64 (m, 2 H, CH2), 2.052.10 (m, 2 H, CH2), 2.21 (br t, 3*J*H,H = 7.5 Hz, 2 H, CH2), 3.67 (dd, 2*J*H,H = 11.2 Hz, 3*J*H,H = 3.8 Hz, 1 H, 1‑CH2), 3.87 (dd, 2*J*H,H = 11.1 Hz, 3*J*H,H = 4.0 Hz, 1 H, 1-CH2), 4.00 (br s, 2 H, OH), 4.024.07 (br m, 1 H, 2‑CH), 4.20 (dd, 3*J*H,F = 15.2 Hz, 3*J*H,H = 6.1 Hz, 1 H, 3‑CH), 4.93 (dt, 3*J*H,F = 38.0 Hz, 3*J*H,H = 7.5 Hz, 1 H, 5‑CH), 7.39 (d, 3*J*H,H = 6.8 Hz, 1 H, NH); 13C NMR (75 MHz, CDCl3:CD3OD, 9:1)  13.6 (q) 22.3 (t), 23.0 (dt, 3*J*C,F = 5.3 Hz, C-6), 25.5 (t), 29.0, 29.0, 29.1, 29.2, (all t), 31.6 (t), 36.3 (t), 52.4 (d, C-2), 61.2 (t, C‑1), 70.4 (dd, 2*J*C,F = 32.3 Hz, C‑3), 108.0 (dd, 2*J*C,F = 13.6 Hz, C‑5), 159.4 (ds, 1*J*C,F = 260.6 Hz, C‑4), 174.5 (s); 19F NMR (282 MHz, CDCl3:CD3OD, 9:1)  125.0 (dd, 3*J*F,H = 38.0 Hz, 3*J*F,H = 15.0 Hz); ESI-MS m/z (%): 606 (100) [M + Na]+, 584 (24) [M + H]+.

1. Oguri, T.; Kawai, N.; Shiori, T.; Yamada, S. *Chem. Pharm. Bull.* **1978,** *26,* 803–808. [↑](#endnote-ref-2)
2. Jennings, J. S.; Wardlaw, W.; Way, W. J. R. *J. Chem. Soc.* **1936,** 637–640. doi:10.1039/JR9360000637 [↑](#endnote-ref-3)
3. Nikolova, G. S.; Haufe, G. *Synthesis* **2008,** 527–536. doi:10.1055/s-2008-1032147 [↑](#endnote-ref-4)
